# Supplementary material for: Journeys to Significant Places in Orthodoxy as a Source of Sustainable Local Development in Romania
Source: MDPI journal article supplement (doi:10.3390/su15075693), 2023-03-24
Supplement: s1 [file s1]

St. Parascheva

1. <https://ziare.com/iasi/pelerinaj-sfanta-parascheva-iasi-moaste-coada-sfanta-parascheva-1765321>

Autor: Alina Toma Sambata, 08 Octombrie 2022, ora 13:55

2. <https://ziare.com/tzanca-uraganu/tzanca-uraganu-ramona-corduneanu-pelerinaj-racla-sf-parascheva-iasi-1766216>

Autor: Tania Petrescu Joi, 13 Octombrie 2022, ora 12:35

3. <https://stirileprotv.ro/stiri/actualitate/pelerinaj-la-sfanta-parascheva-2022-ce-optiuni-de-transport-si-cazare-ai-in-iasi-in-perioada-pelerinajului.html> Autor Bianca Sitaru sursa Agerpres

4. <https://www.wowbiz.ro/program-pelerinaj-sfanta-parascheva-2022-vezi-cand-se-termina-pelerinajul-de-la-moastele-sf-cuvioase-parascheva-de-la-iasi-20258006> Sursa: doxologia.ro

5. <https://www.wowbiz.ro/sfanta-parascheva-2022-care-sunt-regulile-de-acces-la-pelerinajul-de-la-iasi-20257058>

sursă: evz.ro, doxologia.ro

6. <https://a1.ro/news/social/pelerinaj-sfanta-parascheva-2022-programul-celui-mai-asteptat-pelerinaj-al-anului-id1080937.html> Autor: Redacție a1.ro

7. <https://www.hotnews.ro/stiri-esential-25821979-pelerinajul-parascheva-iasi-2022-procesiunile-incep-saptamana-mai-devreme.htm>

8. <https://www.stirilekanald.ro/sf-parascheva-2022-tot-ce-trebuie-sa-stii-despre-pelerinajul-de-la-iasi-20259012> Author: Alina Raducu

9. <https://click.ro/actualitate/fapt-divers/pelerinaj-sf-parascheva-2022-aproape-200000-de-2212658.html> Autor: Ruxandra Rădulescu

10. <https://observatornews.ro/eveniment/pelerinaj-sfanta-parascheva-2022-jandarmii-se-asteapta-la-un-numar-record-de-participanti-credinciosii-stau-la-coada-si-cate-12-ore-492636>. De Clara Mihociu

11. <https://www.antena3.ro/actualitate/locale/pelerinaj-sfanta-parascheva-2022-numar-record-pelerini-dupa-doi-ani-pandemie-653902.html>

ANTENA 3 CNN LIVE

ȘTIRILE DIMINEȚII cu Raluca Mandoiu

12. <https://www.antena3.ro/actualitate/religie/pelerinaj-sfanta-parascheva-2022-reguli-mitropolie-653409.html> de Alexandra Dima

13. <https://www.fanatik.ro/program-pelerinaj-sfanta-parascheva-2022-racla-cu-moaste-scoasa-in-fata-catedralei-mitropolitane-din-iasi-20198457> Autor Flaviu Popa

14. <https://www.stirilekanald.ro/pelerinaj-sf-parascheva-2022-reguli-de-acces-20256969> Autor Madalina Grigore

15. <https://playtech.ro/stiri/sfanta-parascheva-2022-cand-incepe-pelerinajul-de-la-iasi-584322> Autor Ana Chivu

16. <https://www.g4media.ro/record-de-participare-la-pelerinajul-de-la-iasi-pestes-200-000-de-persoane-au-trecut-deja-pe-la-racla-cu-moastele-sfintei-cuvioase-parascheva-iar-timpul-de-asteptare-la-rand-a-ajuns-la-zece-ore.html> Autor Ioana Milonean
17. <https://evz.ro/pelerinaj-sfanta-parascheva-2022-de-ce-trebuie-sa-tina-cont-credinciosii-sfatul-medicului.html> Autor Emma Cristescu
18. <https://spotmedia.ro/stiri/social/incepe-pelerinajul-la-sf-parascheva-unde-sunt-asteptate-pestes-300-000-de-persoane-programul-si-recomandari-de-la-medici>
19. <https://www.mediafax.ro/social/14-octombrie-sfanta-cuvioasa-parascheva-programul-pelerinajului-de-la-iasi-21240714> Autor Cosmin Pîrv
20. <https://adevarul.ro/stiri-locale/iasi/pestes-230000-de-pelerini-la-sfanta-parascheva-2212885.html> Autor Andrei Luca
21. <https://adevarul.ro/stiri-locale/iasi/cel-mai-mare-pelerinaj-din-sud-estul-europei-sute-2212220.html> Autor Andrei Luca
22. <https://adevarul.ro/stiri-locale/iasi/pelerinaj-la-moastele-cuvioasei-parascheva-sfanta-2207448.html> Autor Andrei Luca
23. <https://basilica.ro/prima-zi-de-pelerinaj-la-cuvioasa-parascheva-in-cifre-si-imagini/> Autor Ștefana Totorcea
24. <https://doxologia.ro/sarbatoarea-sfintei-cuvioase-parascheva-iasi-7-16-octombrie-2022-programul-hramului>
25. <https://www.digi24.ro/stiri/actualitate/social/pestes-13-500-de-pelerini-au-stat-la-o-coada-de-cativa-kilometri-pestes-noapte-pentru-a-se-inchina-la-moastele-sfintei-parascheva-2117025>
26. <https://www.wall-street.ro/articol/Social/290325/a-inceput-pelerinajul-la-sfanta-parascheva-cate-ore-ar-putea-romanii-sa-stea-la-coada.html#gref>
27. <https://newsmaker.ro/incepe-pelerinajul-la-sf-parascheva-reguli-de-acces/> Autor Natalia Codrea
28. <https://www.libertatea.ro/stiri/300-000-de-credinciosi-sunt-asteptati-incepand-de-maine-in-pelerinaj-la-sfanta-parascheva-vor-fi-aduse-si-moastele-unui-sfant-cu-origini-in-ucraina-4304112> Autor Cătălin Hopulete
29. <https://www.kanald.ro/14-octombrie-2022-zi-libera-pentru-acesti-romani-cine-nu-va-lucra-de-sfanta-parascheva-20258898> Autor Bianca Hriscu
30. [http://stiri.tvr.ro/pelerinajul-la-sfanta-parascheva-a-avut-un-numar-record-de-credincio-i-pestes-260-de-mii-de-oameni-s-au-inchinat-la-racla-cu-moa-tele-sfinte\\_916465.html#view](http://stiri.tvr.ro/pelerinajul-la-sfanta-parascheva-a-avut-un-numar-record-de-credincio-i-pestes-260-de-mii-de-oameni-s-au-inchinat-la-racla-cu-moa-tele-sfinte_916465.html#view)
31. [http://stiri.tvr.ro/zeci-de-mii-de-pelerini--la-moastele-sfintei-parascheva--26-de-ierarhi-din-romania-si-din-strainatate-au-participat-la-slujba-de-la-hramul-catedralei-mitropolitane-din-iasi\\_916312.html#view](http://stiri.tvr.ro/zeci-de-mii-de-pelerini--la-moastele-sfintei-parascheva--26-de-ierarhi-din-romania-si-din-strainatate-au-participat-la-slujba-de-la-hramul-catedralei-mitropolitane-din-iasi_916312.html#view)
32. [http://stiri.tvr.ro/biserica-ortodoxa-o-praznuie-te-pe-14-octombrie-pe-sfanta-cuvioasa-parascheva-ocrotitoarea-moldovei\\_915961.html#view](http://stiri.tvr.ro/biserica-ortodoxa-o-praznuie-te-pe-14-octombrie-pe-sfanta-cuvioasa-parascheva-ocrotitoarea-moldovei_915961.html#view)

33. [http://stiri.tvr.ro/praznic-la-ia--i-cu-rugaciuni--bucate-calde---i-fapte-bune--peste-30-de-mii-de-oameni-au-participat-la-liturgie--de-sfanta-parascheva\\_916373.html#view](http://stiri.tvr.ro/praznic-la-ia--i-cu-rugaciuni--bucate-calde---i-fapte-bune--peste-30-de-mii-de-oameni-au-participat-la-liturgie--de-sfanta-parascheva_916373.html#view)
34. [http://stiri.tvr.ro/mii-de-sarmale-pentru-pelerinii-de-la-ia--i--preparate-in-bucatarile-directiei-de-asistenta-sociala\\_916281.html#view](http://stiri.tvr.ro/mii-de-sarmale-pentru-pelerinii-de-la-ia--i--preparate-in-bucatarile-directiei-de-asistenta-sociala_916281.html#view)
35. [http://stiri.tvr.ro/record-de-pelerini-la-ia--i--de-ziua-sfintei-parascheva--elevii---i-profesorii-din-jude---vor-avea-zi-libera\\_916216.html#view](http://stiri.tvr.ro/record-de-pelerini-la-ia--i--de-ziua-sfintei-parascheva--elevii---i-profesorii-din-jude---vor-avea-zi-libera_916216.html#view)
36. [http://stiri.tvr.ro/pregatiri-pentru-pelerinajul-de-la-sfanta-parascheva-de-la-ia--i--se-spune-ca-rugaciunile-rostite-catre-sfanta-ocrotitoare-a-moldovei-au-puterea-de-a-face-minuni--vede--i-programul-evenimentului-religios\\_915686.html#view](http://stiri.tvr.ro/pregatiri-pentru-pelerinajul-de-la-sfanta-parascheva-de-la-ia--i--se-spune-ca-rugaciunile-rostite-catre-sfanta-ocrotitoare-a-moldovei-au-puterea-de-a-face-minuni--vede--i-programul-evenimentului-religios_915686.html#view)
37. [http://stiri.tvr.ro/prima-duminica-de-pelerinaj-la-moa--tele-sf--parascheva\\_915933.html#view](http://stiri.tvr.ro/prima-duminica-de-pelerinaj-la-moa--tele-sf--parascheva_915933.html#view)
38. [http://stiri.tvr.ro/zeci-de-mii-de-pelerini-s-au-inchinat-pana-acum-la-raclele-sfintei-parascheva---i-sfantului-paisie-de-la-neam---credincio--ii-continua-sa-vina-in-numar-mare\\_916015.html#view](http://stiri.tvr.ro/zeci-de-mii-de-pelerini-s-au-inchinat-pana-acum-la-raclele-sfintei-parascheva---i-sfantului-paisie-de-la-neam---credincio--ii-continua-sa-vina-in-numar-mare_916015.html#view)
39. [http://stiri.tvr.ro/a-doua-zi-de-pelerinaj-la-iasi-la-sfanta-parascheva\\_915903.html#view](http://stiri.tvr.ro/a-doua-zi-de-pelerinaj-la-iasi-la-sfanta-parascheva_915903.html#view)
40. <https://www.doctorulzilei.ro/medic-roman-organismul-trebuie-pregatit-pentru-pelerinaj-pelerinaj-sfanta-parascheva-2022-recomandarile-specialistilor/> Autor Alecu Carmen
41. <https://www.activenews.ro/stiri/Mesajul-IPS-Parinte-Teofan-catre-pelerini-la-sarbatoarea-Sfintei-Cuvioase-Parascheva-2022.-VIDEO-si-PROGRAMUL-MARELUI-PELERINAJ-176482> de CRONICAR
42. <https://www.9am.ro/stiri/Social/361090/Sfanta-Parascheva-2022-Cand-se-va-incepe-pelerinajul-de-la-Iasi.html> Autor Valentina Podgorneac
43. <https://www.gandul.ro/actualitate/fara-restrictii-la-hramul-sfintei-parascheva-de-la-iasi-numarul-urias-de-credinciosi-asteptati-la-pelerinaj-doar-de-la-voluntari-pleaca-100-de-autocare-19851172>
44. <https://www.stiri-neamt.ro/programul-pelerinajului-sfanta-parascheva-2022-moastele-unui-sfant-din-ucraina-aduse-de-la-neamt-la-iasi/> Autor Dan-Mihail Bîrjoveanu
45. <https://jurnalul.ro/stiri/observator/incepe-pelerinajul-la-sf-cuvioasa-parascheva-de-la-iasi-911420.html> Autor Alice Petrescu
46. <https://www.monitorulbt.ro/local/2022/10/01/pregatirile-pentru-pelerinajul-de-sfanta-parascheva-au-inceput-mii-de-botosaneni-asteptati-in-judetul-vecin-video/> Autor Tudor Chiriac
47. <https://www.gorjonline.ro/pelerinaj-sfanta-parascheva-2022-anuntul-mitropoliei-moldovei/>
48. <https://www.impact.ro/sfanta-parascheva-2022-pe-ce-data-pica-si-care-este-semnificatia-acestei-sarbatori-429296.html> Autor Cazacu Alexandru
49. <https://www.euronews.ro/articole/zeci-de-mii-credinciosi-la-pelerinajul-sfintei-parascheva-numarul-lor-a-depasit-c>
50. <https://www.romania-actualitati.ro/stiri/romania/la-iasi-continua-pelerinajul-la-moastele-sfintei-parascheva-id169356.html> Autor Florin Lepădatu
51. <https://www.romania-actualitati.ro/stiri/romania/mii-de-credinciosi-la-hramul-sfintei-parascheva-id169332.html>

52. <https://www.romania-actualitati.ro/stiri/romania/sf-parascheva-zeci-de-enoriasi-au-avut-nevoie-de-ingrijiri-medicale-id169326.html>
53. <https://www.rador.ro/2022/10/10/la-iasi-continua-pelerinajul-la-moastele-sfintei-parascheva/>  
Postat de G.R.
54. <https://www.b1tv.ro/eveniment/un-antropolog-al-religiilor-compara-pelerinajul-la-sfanta-parascheva-cu-un-untold-religios-mirel-banica-parca-suntem-din-ce-in-ce-mai-putini-si-mai-batrani-randul-de-a-1213655.html> Autor Vladimir Ionescu
55. <https://www.b1tv.ro/eveniment/scandal-la-racla-sfintei-parascheva-credinciosii-trebuie-sa-parcurga-un-traseu-obositor-1212708.html> Autor Beatris Ionita
56. <https://ziarullumina.ro/societate/reportaj/harul-deosebit-al-cuvioasei-175238.html> Autor Constantin Ciofu
57. [https://www.realitatea.net/stiri/actual/sfanta-parascheva-2022-ce-nu-ai-voie-sa-faci-pe-14-octombrie-e-mare-pacat\\_634574a7eed0690903537e72](https://www.realitatea.net/stiri/actual/sfanta-parascheva-2022-ce-nu-ai-voie-sa-faci-pe-14-octombrie-e-mare-pacat_634574a7eed0690903537e72)
58. <https://newsmoldova.ro/iasi/77-de-persoane-venite-in-pelerinaj-la-sfanta-parascheva-de-la-iasi-au-avut-nevoie-in-weekend-de-ajutor-medical/> Autor Mia Pricope
59. <https://www.bzi.ro/pana-si-cele-mai-pioase-credincioase-venite-la-pelerinaj-s-au-luptat-pentru-un-selfie-langa-baldachinul-cu-moastele-sfintei-cuvioase-parascheva-trimitem-copiilor-pe-facebook-4562835> Autor Codruța Șoroagă
60. <https://magnanews.ro/2022/10/zile-de-pelerinaj-la-iasi-dedicate-sfintei-cuvioase-parascheva/> Autor Cornelia Stanciu
61. <https://60m.ro/2022/10/16/sute-de-mii-de-romani-au-participat-la-pelerinajul-sfintei-parascheva/>  
Autor Cimpoi Adrian
62. <https://www.monitorulsv.ro/Religie/2022-10-06/Programul-Sarbatorii-Sfintei-Cuvioase-Parascheva-Iasi-7-16-octombrie-2022>
63. <https://cetateanul.net/stiri-de-ultima-ora/incepe-pelerinajul-la-sf-parascheva-reguli-de-acces/> Autor Filimon Anastasia
64. <https://www.mediafax.ro/social/pelerinajul-la-sfanta-cuvioasa-parascheva-va-incepe-sambata-8-octombrie-21214467> Autor Andreea Tobias

St. Dimitrie the New

1. <https://www.ego.ro/pelerinaj-sf-dimitrie-cel-nou-2022-cand-incepe-si-cum-se-desfasoara-programul-transmis-de-patriarhia-romana-40642.html#:~:text=cel%20Nou%202022.-,Cand%20incepe%20si%20cum%20se%20desfasoara,in%20perioada%2022%20-%2028%20octombrie> Autor Cezar Andrei
2. <https://stirileprotv.ro/divers/pelerinaj-sfantul-dimitrie-basarabov-2022-care-este-programul-si-traseul.html> Autor Bianca Sitaru
3. <https://www.mediafax.ro/social/incepe-pelerinajul-de-sf-dimitrie-cel-nou-ocrotitorul-bucurestilor-21261911> Autor Cosmin Pîrv
4. <https://observatornews.ro/eveniment/pelerinaj-sfantul-dumitru-2022-pentru-ce-se-roaga-romanii-caniciodata-la-moastele-sf-dimitrie-cel-nou-494120.html> Autor Mădălina Iacob
5. <https://basilica.ro/pelerinaj-la-sfantul-dimitrie-cel-nou-jurnal-de-voluntar/> Autor Alexandru Boboc
6. <https://www.antena3.ro/actualitate/religie/pelerinajul-sfantul-dimitrie-cel-nou-2022-655193.html> Știri cu Loredana Ștefu
7. <https://www.libertatea.ro/stiri/sfantul-dimitrie-cel-nou-ocrotitorul-bucurestilor-2426045> Auctor Petre Dobrescu
8. <https://www.stirilekanald.ro/sfantul-dimitrie-2022-a-inceput-cel-mai-mare-pelerinaj-din-capitala-20261943> Autor Sorin Negru
9. <https://www.fanatik.ro/sfantul-dimitrie-cel-nou-2022-programul-complet-al-pelerinajului-din-bucuresti-20208252> Autor Andreea Marin
10. <https://www.puterea.ro/program-pelerinaj-sfantul-dumitru-2022-tot-ce-aveti-de-facut-pe-zile/> Autor Eliza Popa
11. <https://evz.ro/pelerinaj-la-sfantul-dumitru-programul-slujbelor-si-locul-in-care-se-va-tine-evenimentul.html> Autor Emma Cristescu
12. <https://www.unica.ro/diverse/sfantul-dimitrie-cel-nou-2022-programul-pelerinajului-din-bucuresti-461996> De Unica.ro
13. <https://jurnalul.ro/stiri/observator/azi-incepe-pelerinajul-de-sfantul-dimitrie-cel-nou-ocrotitorul-bucurestilor-912931.html>
14. <https://www.g4media.ro/sute-de-pelerini-la-dealul-patriarhiei-in-a-doua-zi-de-pelerinaj-dedicat-sfantului-dimitrie-ocrotitorul-capitaliei.html> Autor Bogdan Dascalu
15. <https://www.euronews.ro/articole/pelerinaj-la-patriarhia-romana-bucurestenii-il-sarbatoresc-pe-sfantul-dimitrie-ce> Autor Mirabela Vasile
16. <https://www.euronews.ro/articole/pelerinaj-la-patriarhia-romana-bucurestenii-il-sarbatoresc-pe-sfantul-dimitrie-ce> Autor Mirabela Vasile
17. <https://www.hashtagnews.ro/19/10/2022/bucuresti/patriarhia-romana-sf-dimitrie-cel-nou-pelerinaj-bucuresti/> Autor Dobre Dana

18. <https://www.crestinortodox.ro/sarbatori/sfantul-dimitrie-nou-basarabov/sarbatoarea-sfantului-cuvios-dimitrie-nou-22-octombrie-2022-28-octombrie-2022-161245.html>
19. <https://www.impact.ro/pelerinaj-de-sarbatoarea-sfantului-cuvios-dimitrie-cel-nou-la-bucuresti-cand-incepe-si-care-este-programul-436391.html> Autor Ana Anitoiu
20. <https://primanews.ro/cozi-la-moastele-sfantului-dimitrie-cel-nou/>
21. <https://www.romania-actualitati.ro/stiri/romania/bucuresti-pelerinaj-la-moastele-sf-dimitrie-de-la-catedrala-patriarhala-id169804.html> Autorv Remus Rădulescu
22. <https://click.ro/actualitate/national/capitala-se-pregateste-pentru-sarbatoarea-2213978.html> Autor Adrian Popescu
23. <https://www.capital.ro/sarbatoarea-sf-cuvios-dimitrie-cel-nou-ocrotitorul-bucurestilor-programul-integral-al-pelerinajului.html> Autor Radu Andone
24. <https://jurnaluldearges.ro/incepe-pelerinajul-de-sf-dimitrie-cel-nou-in-bucuresti-220862/> Autor Simion Cristina
25. <https://www.gsp.ro/fotbal/liga-1/gigi-becali-pelerinaj-sfantul-dimitrie-cel-nou-678077.html> Autor Dumitru Angelescu
26. <https://www.doctorulzilei.ro/sf-dimitrie-cel-nou-programul-pregatit-de-patriarhie-pentru-credinciosii-care-vor-sa-se- inchine-la-sfintele-moaste-ale-sfantului-cuvios-dimitrie-cel-nou-ocrotitorul-bucurestilor-ale-sfintilor-impa/> Autor Simona David
27. [https://www.realitatea.net/stiri/actual/sute-de-credinciosi-pe-dealul-patriarhiei-in-a-doua-zi-de-pelerinaj-sarbatoarea-sfantului-cuvios-dimitrie-cel-nou-ocrotitorul-bucurestilor\\_6354f9c3bf38b640ca1c33e3](https://www.realitatea.net/stiri/actual/sute-de-credinciosi-pe-dealul-patriarhiei-in-a-doua-zi-de-pelerinaj-sarbatoarea-sfantului-cuvios-dimitrie-cel-nou-ocrotitorul-bucurestilor_6354f9c3bf38b640ca1c33e3)
28. <https://www.rador.ro/2022/10/24/la-catedrala-patriarhala-din-capitala-se-desfasoara-pelerinajul-traditional-inainte-de-sarbatoarea-sfantului-dimitrie-cel-nou/> Postat de G.R.
29. <https://www.activenews.ro/stiri/Minunea-de-la-Moastele-Sfantului-Dimitrie-cel-Nou-Leacul-pentru-toti-guvernanti-care-nu-au-venit-sa-se- inchine-Ocrotitorului-Bucurestilor.-MARTURIE-177185> de CRONICAR
30. <https://www.universulargesean.ro/a-inceput-traditionalul-pelerinaj-la-moastele-sfantului-dimitrie-cel-nou-de-la-catedrala-patriarhala/> Autor Marta Elena
31. <https://www.kanald.ro/sfantul-cuvios-dimitrie-cel-nou-2022-rugaciunile-ce-ne-protejeaza-de-necazuri-20262718> Autor Bianca Vidoi
32. <https://www.kanald.ro/sfantul-dumitru-2022-ce-traditii-obiceiuri-si-superstitii-se-respecta-de-sfantul-mucenic-dimitrie-izvoratorul-de-mir-obiectul-pe-care-nu-trebuie-sa-il-folosesti-20262558> Autor Amalia Georgescu
33. <https://www.kanald.ro/ce-se-da-de-pomana-de-sfantul-mucenic-dimitrie-izvoratorul-de-mir-iata-ce-se-imparte-pe-26-octombrie-20262277> Autor Amalia Georgescu

34. <https://www.gandul.ro/actualitate/exclusiv-video-zeci-de-mii-de-pelerini-au-venit-sa-se- inchine-la-moastele-sfantului-dimitrie-cel-nou-ocrotitorul-bucurestiului-este-ajutator-al-romanilor-de-pretutindeni-face-mari-miraco-19863470> Autor Bianca Iliescu
35. <https://a1.ro/news/social/sfantul-dimitrie-cel-nou-basarabov-traditii-si-obiceiuri-ce-trebuie-neaparat-sa-faci-azi-ca-sa-iti-mearga-bine-tot-anul-id1082420.html> Autor Redacție a1.ro
36. [https://www.stiripesurse.ro/video-liturgie-la-catedrala-patriarhala-in-a-patra-zi-de-pelerinaj-la-sfantul-dimitrie-cel-nou\\_2623510.html](https://www.stiripesurse.ro/video-liturgie-la-catedrala-patriarhala-in-a-patra-zi-de-pelerinaj-la-sfantul-dimitrie-cel-nou_2623510.html) Autor Alexandru Popescu
37. <https://newsbucuresti.ro/incepe-pelerinajul-de-sfantul-dimitrie-cel-nou-ocrotitorul-bucurestilor-cand-are-loc-procesiunea-calea-sfintilor/>
38. <https://www.ordineazilei.ro/pelerinaj-in-dealul-mitropoliei-cu-ocazia-sarbatorii-sfantului-cuvios-dimitrie-cel-nou/> Autor Filip Denis
39. <https://stiri.md/article/international/pelerinajul-de-sfantul-dumitru-mii-de-oameni-s-au-inchinat-la-moaste>
40. <https://editiadedimineata.ro/pregatiri-la-catedrala-patriarhala-pentru-sarbatoarea-sfantului-dimitrie-cel-nou-programul-pelerinajului/> Autor Maria Constantinoiu
41. <https://cns24.ro/sute-de-credinciosi-pe-dealul-patriarhiei-in-a-doua-zi-de-pelerinaj-sarbatoarea-sfantului-cuvios-dimitrie-cel-nou-ocrotitorul-bucurestilor/>
42. <https://www.b1tv.ro/eveniment/pelerinaj-in-bucuresti-la-moastele-sfantului-dimitrie-cel-nou-se-va-desfasura-pana-vineri-1218653.html> Autor Bogdan Pitaru
